# Supplementary material for: The effects of arginine supplementation through different ratios of arginine:lysine on performance, skin quality and creatine levels of broiler chickens fed diets reduced in protein content
Source: PubMed Central journal article supplement (PMC9508590; doi:10.1016/j.psj.2022.102148), 2022-08-27

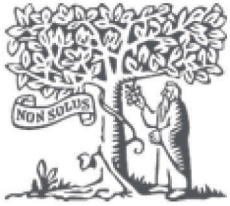

ELSEVIER

# Certificate of Elsevier Language Editing Services

**The following article was edited by Elsevier Language Editing Services:**

**"The effects of arginine supplementation through different ratios of arginine: lysine on performance, skin quality and creatine levels of broiler chickens fed diets reduced in protein content."**

**Authored by:**

**Carlos Henrique de Oliveira**

Date: 28-Apr-2022

Serial number: LE-238404-4B7157FFFBC0

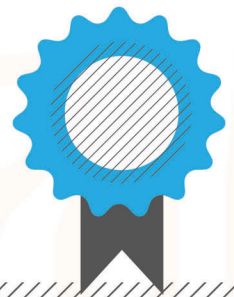

Supplement: mmc2.pdf [file mmc2.pdf]
